# Supplementary material
Source: MDPI journal article supplement (https://www.mdpi.com/2076-3417/8/9/1455)
Supplement: s1 [file s1]

# Microemulsion Encapsulated into Halloysite Nanotubes and their Applications for Cleaning of a Marble Surface

Giulia Lo Dico, Francesca Semilia, Stefana Milioto, Filippo Parisi, Giuseppe Cavallaro, Giuseppe Inguì, Mazyar Makaremi, Pooria Pasbakhsh and Giuseppe Lazzara

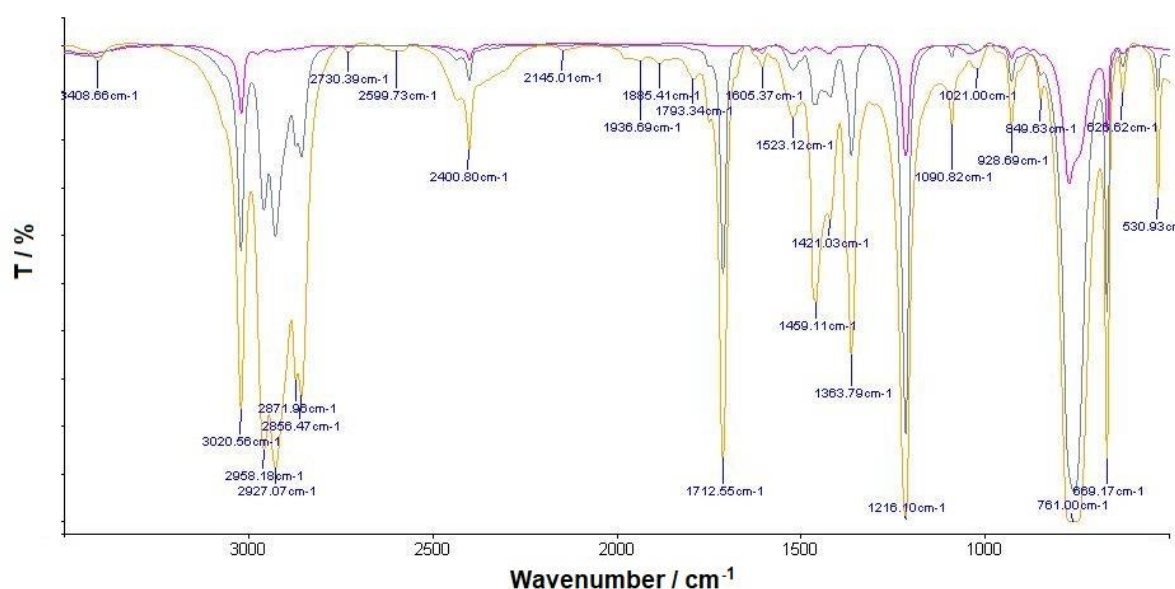

Figure S1. FTIR spectra of extracts after first (yellow), second (grey) and third (pink) cleaning cycle.

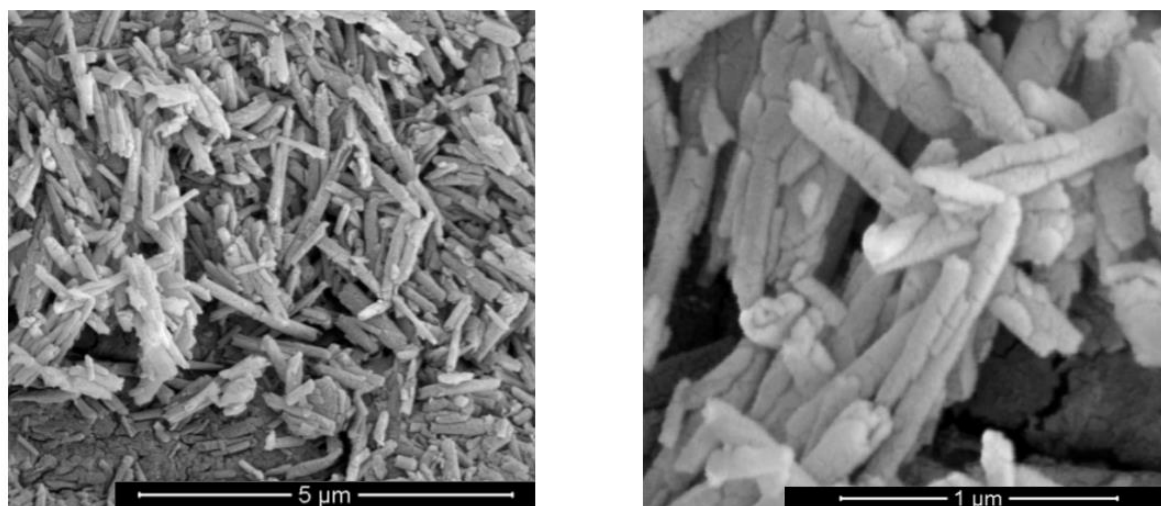

Figure S2. SEM images of Halloysite nanotubes.
